# Supplementary material for: Cascade synthesis of a gold nanoparticle–network polymer composite
Source: Royal Society of Chemistry journal article supplement (doi:10.1039/c5nr06594a), 2015-11-02
Supplement: c5nr06594a1.pdf [file c5nr06594a1.pdf]

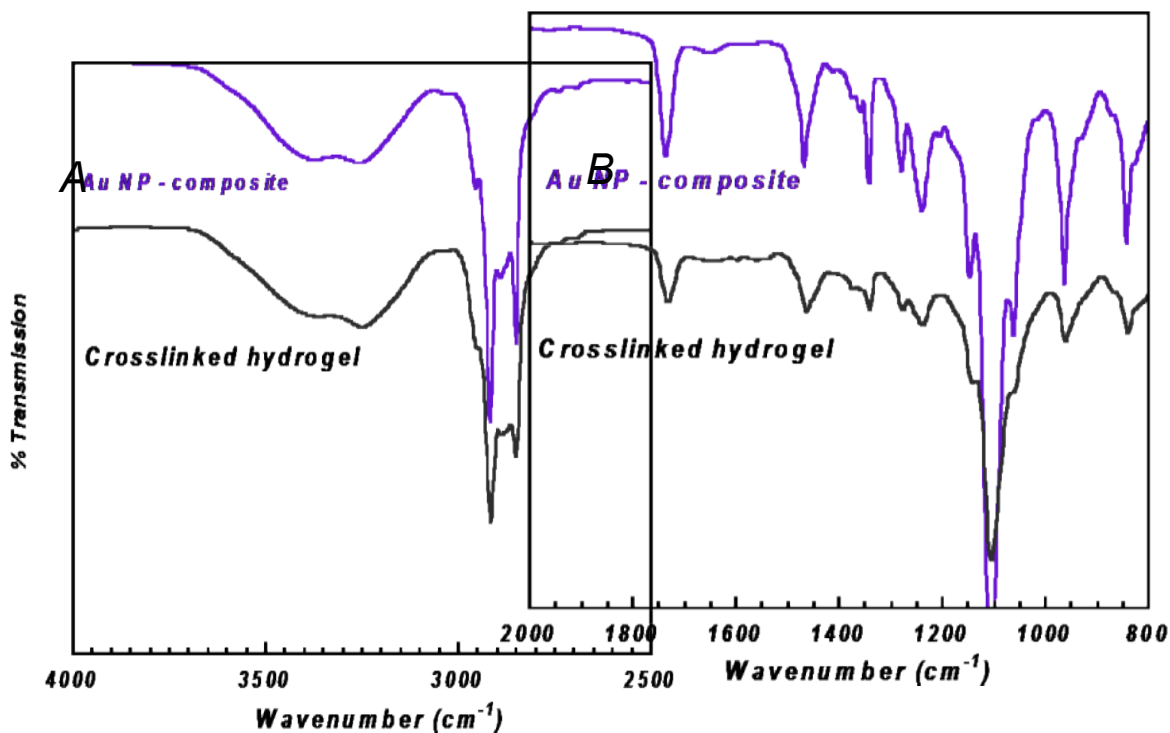

Figure S1. Comparison of ATR/FTIR spectra collected on photoinitiated crosslinked F98(Acr)<sub>2</sub>-based complex fluid (black curve) to Au-NP composite (purple curve). (A) high frequency region and (B) low frequency region.

Fig. S1

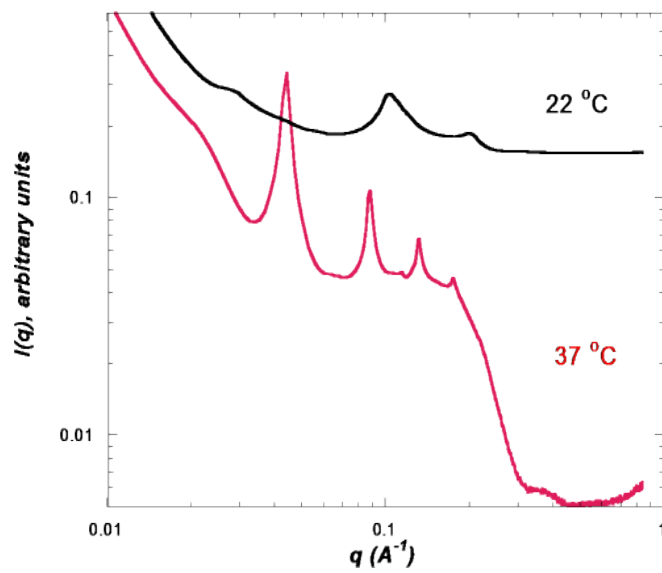

Figure S2. Temperature dependent SAXS profiles collected on the mesophase prior to gelation.
